# Supplementary material
Source: PubMed Central journal article supplement (PMC5385271)
Supplement: NIHMS842353-supplement-01.pdf [file NIHMS842353-supplement-01.pdf]

## SUPPLEMENTARY MATERIAL

Supplemental Table 1. Quality control filters for single nucleotide polymorphism

| Criteria                         | # of excluded variants | # of passed variants |
|----------------------------------|------------------------|----------------------|
| MAF < 1%                         | 29,429,731             | 8,613,031            |
| Call rate per variant < 95%      | 1,928,184              | 6,684,847            |
| HWE test in controls < $10^{-5}$ | 19,386                 | 6,665,461            |

Key: MAF, minor allele frequency; HWE, Hardy-Weinberg equilibrium

Supplemental Table 2. Gene-based associations of the target four genes with hippocampal sclerosis of aging assuming a recessive/additive/dominant mode of inheritance in people who died at age 80 years or older (n = 1,883)

| Gene            | Gene-based p-value |        |        |
|-----------------|--------------------|--------|--------|
|                 | REC                | ADD    | DOM    |
| <i>GRN</i>      | 0.24               | 0.035  | 0.026  |
| <i>TMEM106B</i> | 0.027              | 0.0032 | 0.0070 |
| <i>ABCC9</i>    | 0.0017             | 0.0099 | 0.18   |
| <i>KCNMB2</i>   | 0.23               | 0.014  | 0.015  |

Key: REC, recessive; ADD, additive; DOM, dominant

Supplemental Figure 1. The first and second principal components plots along with 1000 genome reference samples. Block dot indicates individuals in this study. We chose individuals within the red dotted circle based on Euclidean distance from an individual with maximum first and second principal components.

Key: AFR, African; AMR, Admixed American; EAS, East Asian; EUR, European; SAS, South Asian
